# Supplementary material
Source: PubMed Central journal article supplement (PMC6644308)
Supplement: ao6b00385_si_001.pdf [file ao6b00385_si_001.pdf]

# Supporting Information

## Metal-Organic Framework/Graphene Quantum Dots Nanoparticles Used for Synergistic Chemo-Photothermal Therapy

Zhengfang Tian<sup>a1</sup>, Xianxian Yao<sup>b1</sup>, Kexin Ma<sup>b</sup>, Xingxing Niu<sup>b</sup>, Julia Grothe<sup>c</sup>, Qingni Xu<sup>a</sup>, Liansheng Liu<sup>a</sup>, Stefan Kaskel<sup>c\*</sup>, Yufang Zhu<sup>a,b\*</sup>

<sup>a</sup> Hubei Key Laboratory of Processing and Application of Catalytic Materials, College of Chemical Engineering, Huanggang Normal University, Huanggang 438000, China.

<sup>b</sup> School of Materials Science and Engineering, University of Shanghai for Science and Technology, 516 Jungong Road, Shanghai 200093, China.

<sup>c</sup> Professur für Anorganische Chemie I, Fachrichtung Chemie und Lebensmittelchemie, Technische Universität Dresden, Bergstrasse 66, Dresden, 01062, Germany.

<sup>1</sup> the first two authors contributed equally to this work.

Corresponding authors:

Stefan Kaskel: [stefan.kaskel@chemie.tu-dresden.de](mailto:stefan.kaskel@chemie.tu-dresden.de)

Yufang Zhu: [zjf2412@163.com](mailto:zjf2412@163.com)

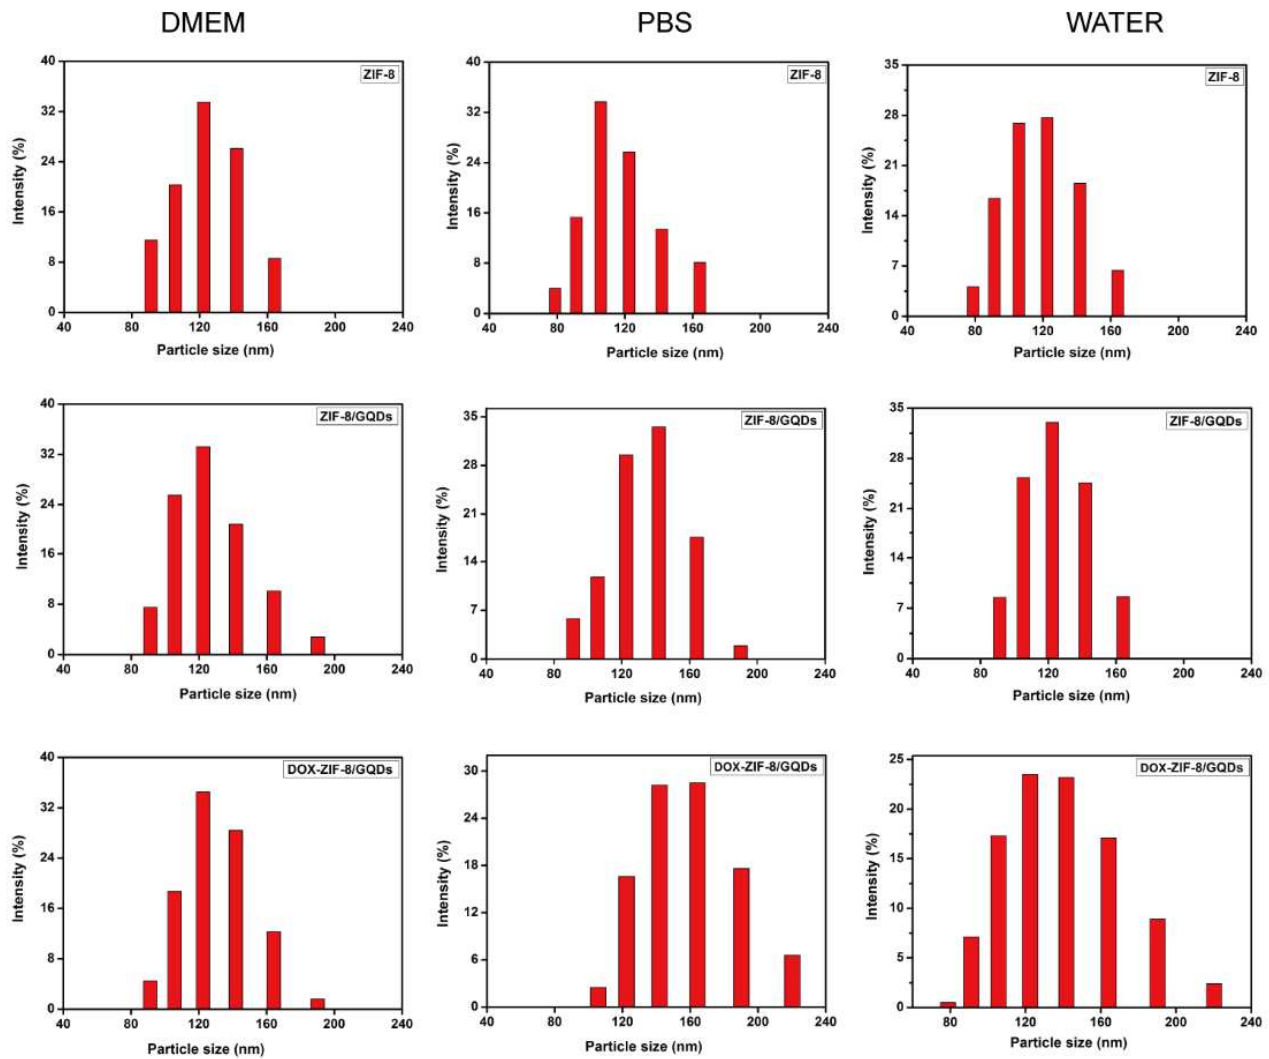

Figure S1 The particle size distributions of the ZIF-8, ZIF-8/GQDs and DOX-ZIF-8/GQDs nanoparticles in water, PBS and culture medium (Dulbecco's Modified Eagle Medium, DMEM) measured by dynamic laser scattering (DLS).

Table S1 the average particle sizes of the ZIF-8, ZIF-8/GQDs and DOX-ZIF-8/GQDs nanoparticles in water, PBS and DMEM.

| Samples    | DMEM (nm) | PBS (nm)  | Water (nm) |
|------------|-----------|-----------|------------|
| ZIF-8      | 111.1±7.3 | 112.6±5.3 | 111.9±6.4  |
| ZIF-8/GQDs | 120.3±5.3 | 123.8±8.2 | 119.8±7.6  |

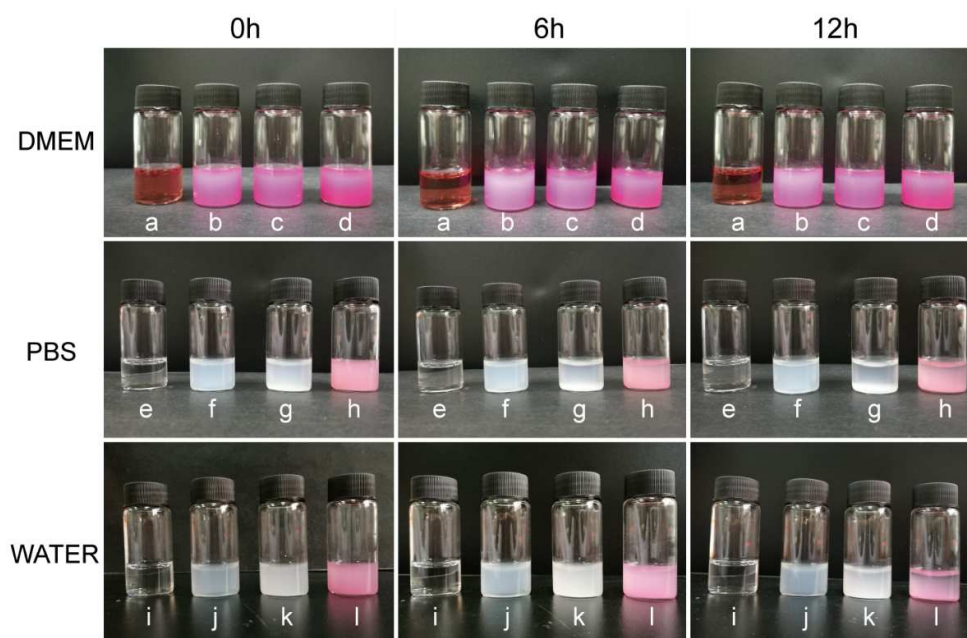

Figure S2 photograph of the suspensions of the ZIF-8, ZIF-8/GQDs and DOX-ZIF-8/GQDs nanoparticles in water, PBS and DMEM after statically placing for 6 and 12 h. (a: DMEM; b: ZIF-8 in DMEM; c: ZIF-8/GQDs in DMEM; d: DOX-ZIF-8/GQDs in DMEM; e: PBS; f: ZIF-8 in PBS; g: ZIF-8/GQDs in PBS; h: DOX-ZIF-8/GQDs in PBS; i: water; j: ZIF-8 in water; k: ZIF-8/GQDs in water; l: DOX-ZIF-8/GQDs in water)

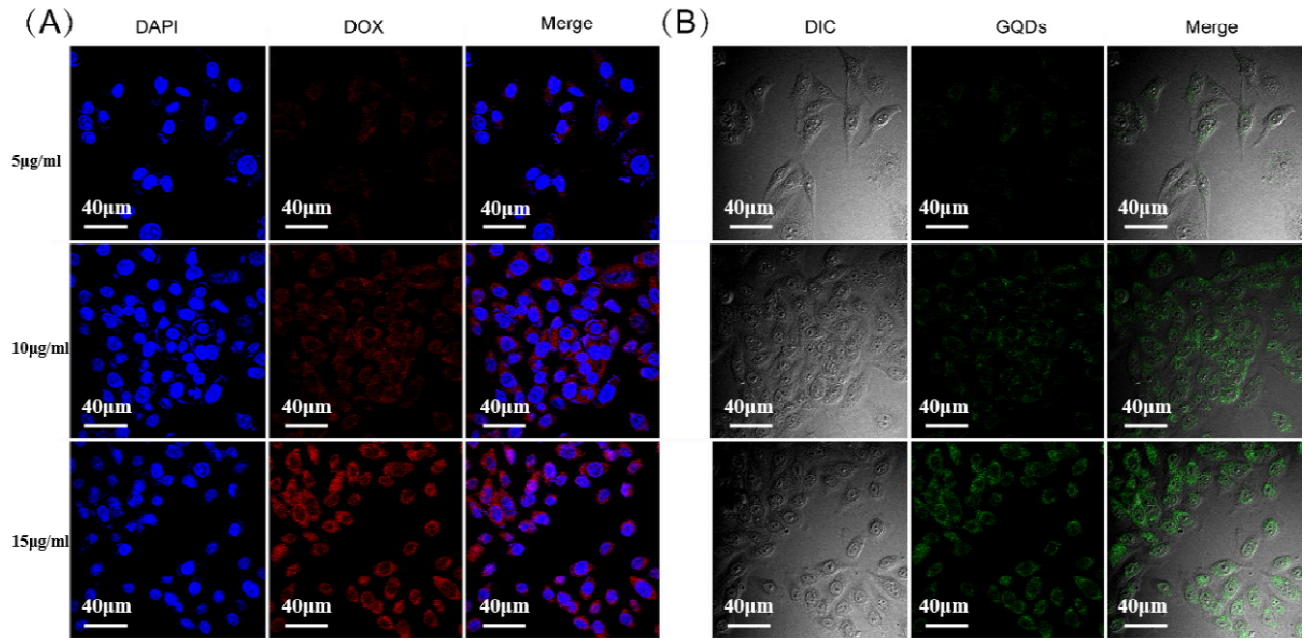

Figure S3 Confocal microscope images of 4T1 cells after 2 h incubation with the DOX-ZIF-8/GQDs nanoparticles at the concentrations of 5, 10 and 15 µg/ml. (A) is for DAPI and DOX channels and (B) is for DIC and GQDs channels.

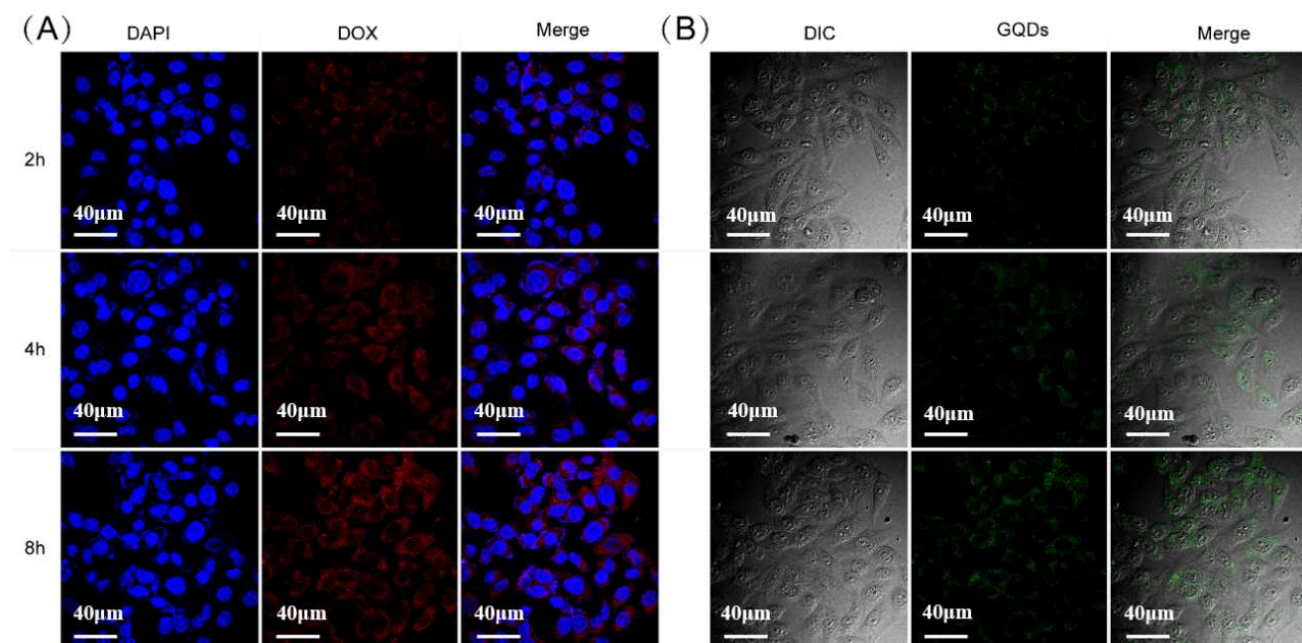

Figure S4 Confocal microscope images of 4T1 cells after 2, 4 and 8 h incubation with the DOX-ZIF-8/GQDs nanoparticles at a concentration of 10 μg/ml. (A) is for DAPI and DOX channels and (B) is for DIC and GQDs channels.
